# Supplementary material
Source: publisher figshare collection journal article supplement (https://acs.figshare.com/ndownloader/files/15772286)
Supplement: Supplementary file 1 [file 15772286]

# Supporting Information

## Hollow Microcapsules with Ulcerative Colitis Therapeutic

### Effects made of Multifunctional Turkish galls extraction

Xing Zhang<sup>1,2 a</sup>, Jie Zang<sup>1 a</sup>, Shangzhi Ma<sup>1</sup>, Wei Yu<sup>1</sup>, Fei Long<sup>1</sup>, Rong Qi<sup>2</sup>,  
Gang Guo<sup>3</sup>, liangxue Zhou<sup>3</sup>, Bo Han<sup>1\*</sup>

*1 Shihezi University College of Pharmacy / Key Laboratory of Xinjiang Endemic Phytomedicine Resources Ministry of Education, Shihezi University College of Chemistry and Chemical Engineering / Key Laboratory for Green Process of Chemical Engineering Ministry of Education, Shihezi 832003, P. R. China;*

*2 Peking University Institute of Cardiovascular Sciences Peking University Health Science Center / Key Laboratory of Molecular Cardiovascular Sciences, Ministry of Education, 38 Xueyuan Rode, Beijing 100191, P. R. China;*

*3 State Key Laboratory of Biotherapy and Cancer Center, and Department of Neurosurgery, West China Hospital, Sichuan University / Collaborative Innovation Center for Biotherapy, Chengdu 610041, P. R. China.*

---

\* Corresponding author at: Bo Han, hanbodexinxiang@163.com, School of Pharmacy, Shihezi University, Shihezi, 832002, Xinjiang, P. R. China.

a These two authors equally contributed to the work.

## Supplementary information

**Table S1 | DAI score**

| Weight loss (%) | fecal consistency | fecal occult blood | score |
|-----------------|-------------------|--------------------|-------|
| normal          | normal            | negative           | 0     |
| 0-5             | forming fecal     | positive           | 1     |
| 5-10            | semi-formed fecal | positive           | 2     |
| 10-15           | loose fecal       | bleeding           | 3     |
| >15             | watery diarrhea   | bleeding           | 4     |

**Note:** normal fecal; forming fecal; loose fecal: does not stick to the anal paste, semi-formed fecal; loose fecal: can be attached to the anus of the watery stools.

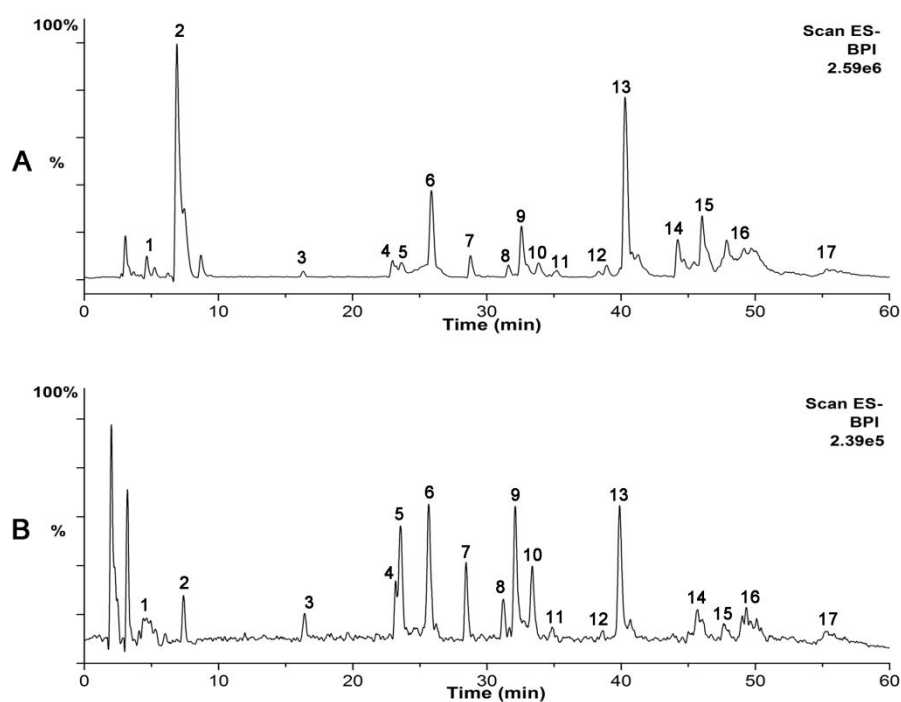

**Figure S1 | Identification of chemical constituents (A) Total ion chromatogram of TGTs in negative ion mode. (B) Total ion chromatogram of TGTs-Fe<sup>III</sup> microcapsules after disassembly in concentrated HCl. The detailed information was shown in Table S2.**

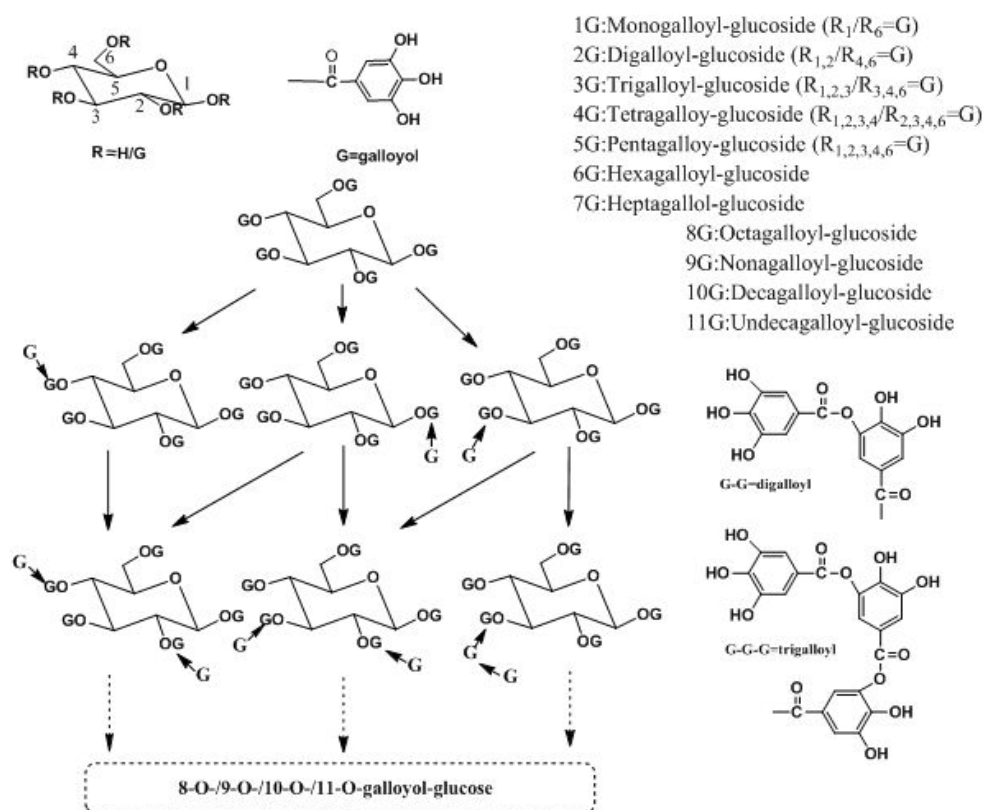

**Figure S2 | Chemical formula of gallic tannins in the Turkish galls.**

**Table S2 | Chemical composition, RT and charge-mass ratio of TGTs**

| Number          | molecular formula                               | Identification              | RT (min)                              | [M-H] <sup>-</sup> m/z |
|-----------------|-------------------------------------------------|-----------------------------|---------------------------------------|------------------------|
| 1               | C <sub>13</sub> H <sub>16</sub> O <sub>10</sub> | mono-O-galloyl-β-D-glucose  | 4.06, 6.06                            | 330.90                 |
| 2               | C <sub>7</sub> H <sub>6</sub> O <sub>5</sub>    | gallic acid                 | 7.42                                  | 169.12                 |
| 3, 4, 5         | C <sub>20</sub> H <sub>19</sub> O <sub>14</sub> | di-O-galloyl-β-D-glucose    | 16.33, 23.55                          | 483.21                 |
| 6               | C <sub>14</sub> H <sub>10</sub> O <sub>9</sub>  | digallic acid               | 25.71                                 | 321.24                 |
| 7, 8, 9, 10, 11 | C <sub>27</sub> H <sub>23</sub> O <sub>18</sub> | tri-O-galloyl-β-D-glucose   | 28.41, 31.26<br>32.13,<br>33.32,34.92 | 635.24                 |
| 12, 13          | C <sub>34</sub> H <sub>27</sub> O <sub>22</sub> | tetra-O-galloyl-β-D-glucose | 38.96, 39.89<br>40.70                 | 787.14                 |
| 14, 15          | C <sub>41</sub> H <sub>31</sub> O <sub>26</sub> | penta-O-galloyl-β-D-glucose | 45.20, 45.71                          | 939.17                 |
| 16              | C <sub>48</sub> H <sub>35</sub> O <sub>30</sub> | hexa-O-galloyl-β-D-glucose  | 47.87, 49.64                          | 1091.32                |

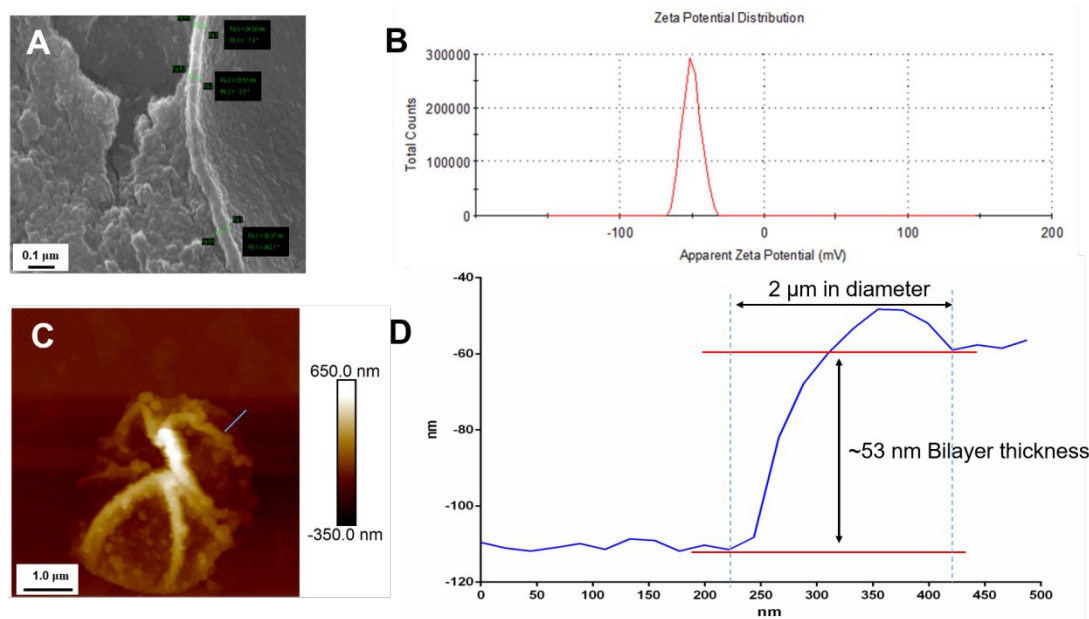

**Figure S3 | (A) SEM characterized wall thickness of microcapsules. (B) Zeta potentials of TGTs-Fe<sup>III</sup> microcapsules. (C and D) AFM micrograph showed the collapsed bilayer thickness of the of TGTs-Fe<sup>III</sup> microcapsules (capsule shell thickness can be caculated as half of the bilayer thickness).**

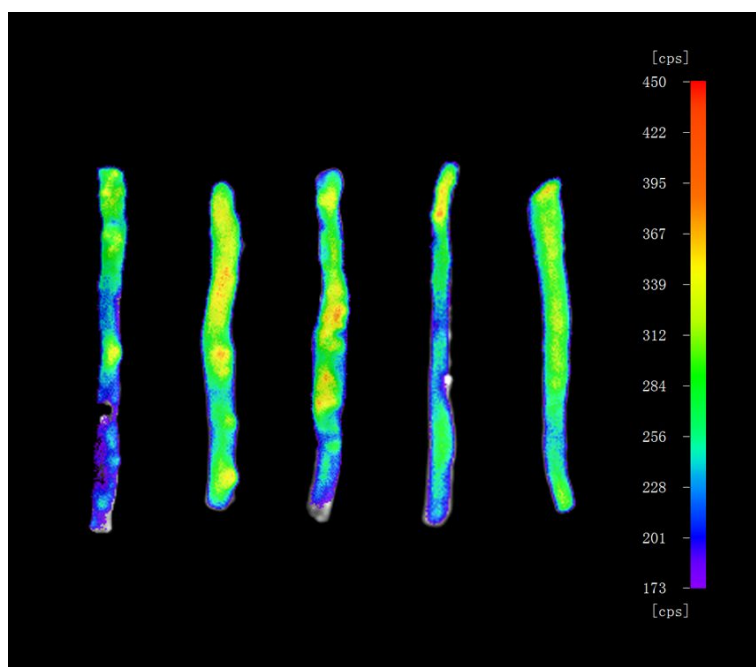

**Figure S4 | The background fluorescence was obtained from colonic tissue of mice with UC without enema treatment. After enema treatment, the fluorescence signal was significantly enhanced, which was stronger than background fluorescence.**
